# Supplementary material for: Cytotoxic and apoptosis-inducing effects of wildtype and mutated Hydra actinoporin-like toxin 1 (HALT-1) on various cancer cell lines
Source: PeerJ journal article supplement (doi:10.7717/peerj.6639), 2019-05-02

Supplementary Material - Figure 1

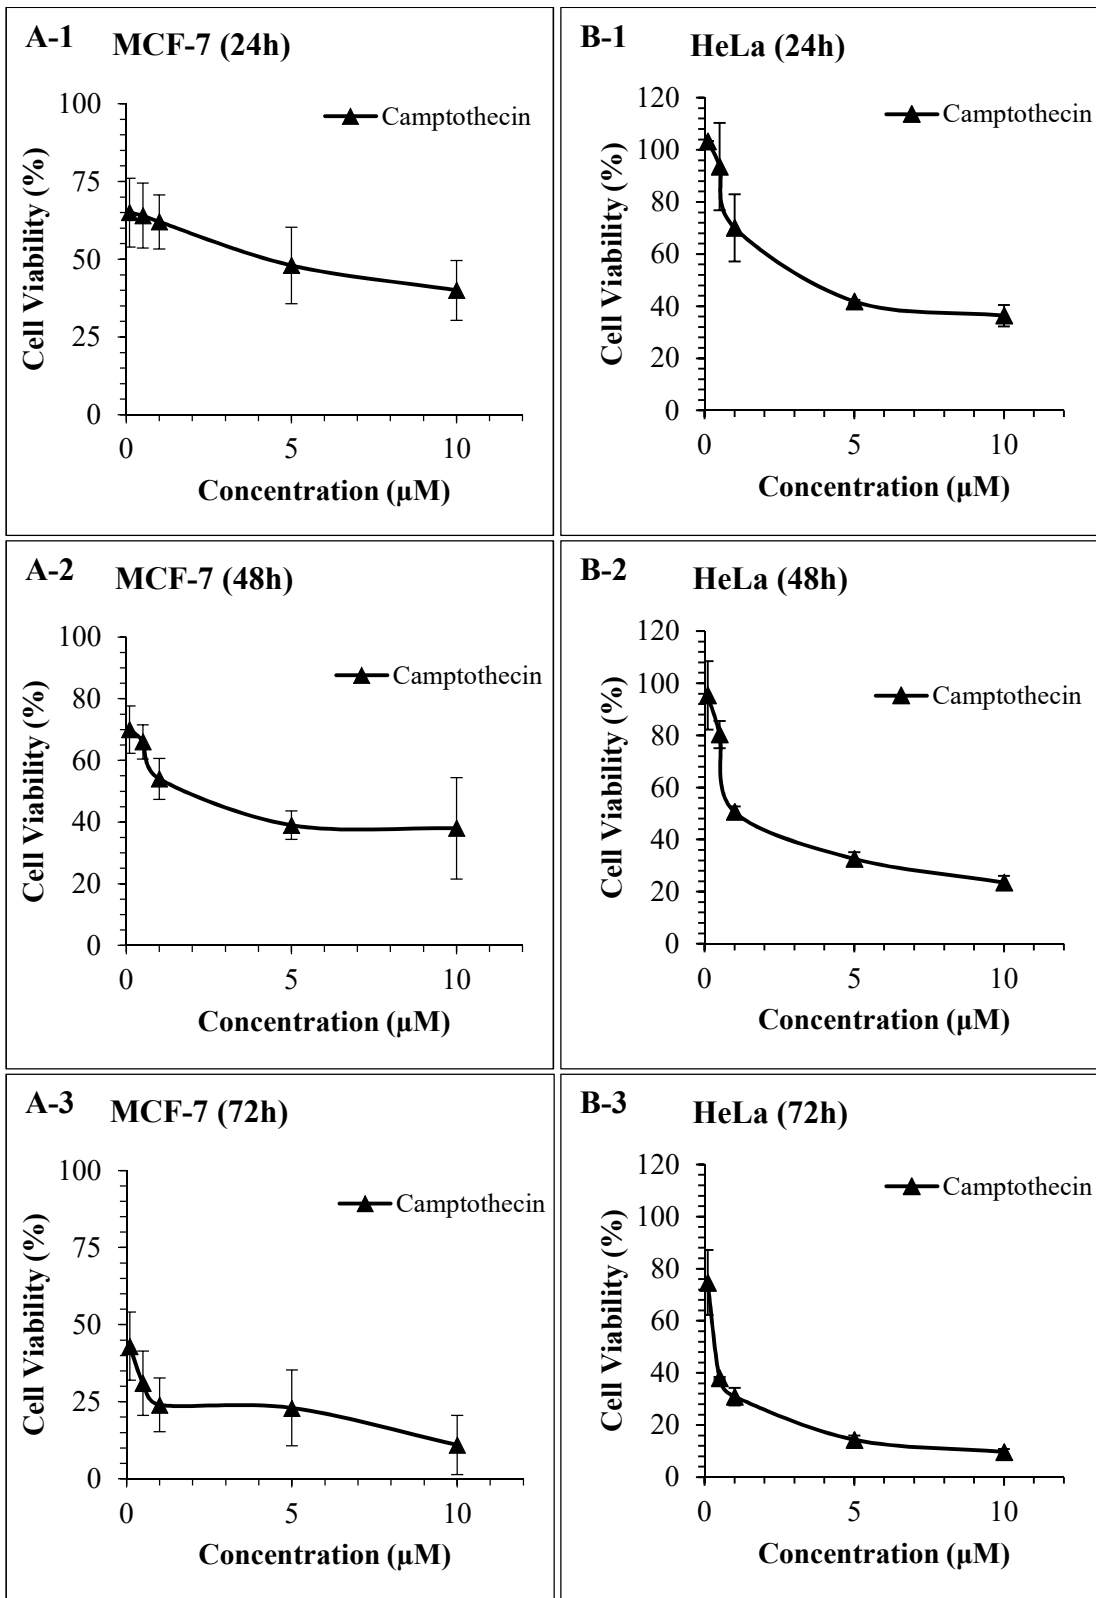

Supplement: Figure_S1.pdf [file Figure_S1.pdf]
