# Supplementary material for: Cytotoxic and apoptosis-inducing effects of wildtype and mutated Hydra actinoporin-like toxin 1 (HALT-1) on various cancer cell lines
Source: PubMed Central journal article supplement (PMC6500716; doi:10.7717/peerj.6639), 2019-05-02

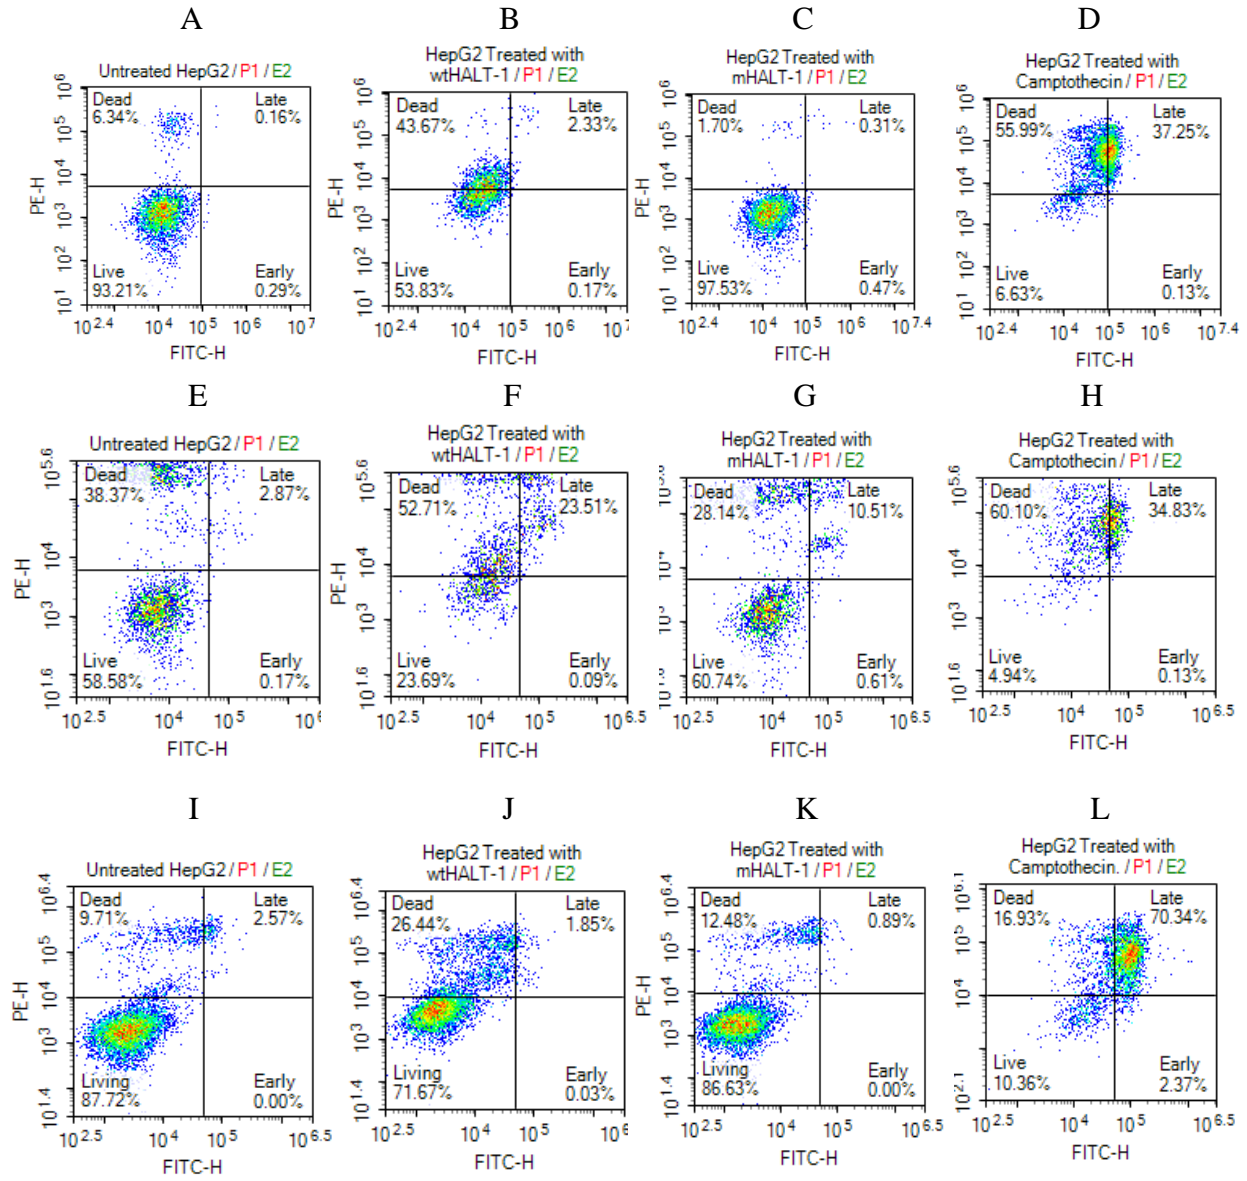

Supplement: peerj-07-6639-s012.pdf [file peerj-07-6639-s012.pdf]
