# Supplementary material for: Cytotoxic and apoptosis-inducing effects of wildtype and mutated Hydra actinoporin-like toxin 1 (HALT-1) on various cancer cell lines
Source: PubMed Central journal article supplement (PMC6500716; doi:10.7717/peerj.6639), 2019-05-02

Replicate 1

Replicate 2

Replicate 3

Untreated

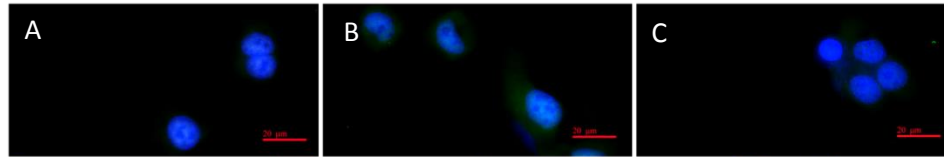

wtHALT-1

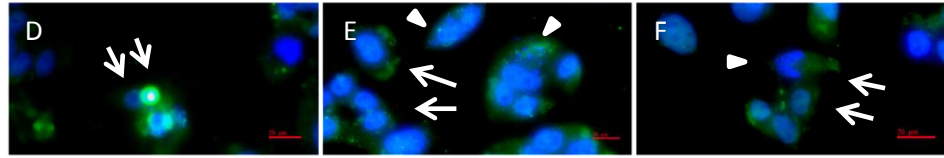

mHALT-1

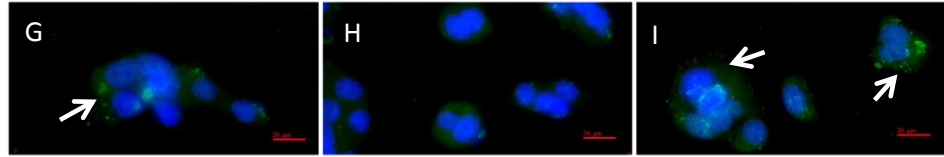

Camptothecin

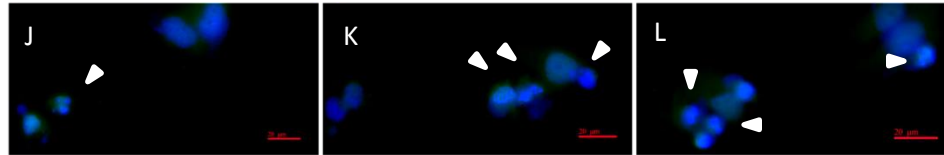

Supplement: peerj-07-6639-s017.pdf [file peerj-07-6639-s017.pdf]
