# Supplementary material for: Cytotoxic and apoptosis-inducing effects of wildtype and mutated Hydra actinoporin-like toxin 1 (HALT-1) on various cancer cell lines
Source: PeerJ. 2019 May 2;7:e6639. doi: 10.7717/peerj.6639 (PMC6500716; doi:10.7717/peerj.6639)
Supplement: Supplemental Information 3 — Minus blank is average value of each concentration subtracted with average of blank. Standard deviation is standard error calculated from the three readings. [file peerj-07-6639-s006.xlsx]

## Sheet: Sheet1
MCF-7 (1st Replicate)	Concentration of wtHALT-1 (µg/mL)									MCF-7 (1st Replicate)	Concentration of mHALT-1 (µg/mL)
Absorbance 570nm	15	10	5	3	2	1	0	Blank		Absorbance 570nm	15	10	5	3	2	1	0	Blank
Reading 1	0.08	0.154	0.475	1.079	0.973	0.823	1.323	0.086		Reading 1	0.427	0.601	0.429	0.541	0.497	0.501	0.474	0.11
Reading 2	0.095	0.169	0.712	0.801	0.766	0.872	0.987	0.081		Reading 2	0.536	0.475	0.473	0.482	0.512	0.483	0.452	0.092
Reading 3	0.087	0.123	0.84	0.777	1.1	1.013	1.074	0.079		Reading 3	0.529	0.509	0.455	0.459	0.569	0.442	0.521	0.102
Average	0.087 ± 0.008	0.149 ± 0.023	0.676 ± 0.185	0.886 ± 0.168	0.946 ± 0.169	0.903 ± 0.099	1.128 ± 0.174	0.082 ± 0.004		Average	0.497 ± 0.061	0.528 ± 0.065	0.452 ± 0.022	0.494 ± 0.042	0.526 ± 0.038	0.475 ± 0.030	0.482 ± 0.035	0.101 ± 0.009
Minus blank	0.005 ± 0.008	0.067 ± 0.023	0.594 ± 0.185	0.804 ± 0.168	0.864 ± 0.169	0.821 ± 0.099	1.046 ± 0.174	0		Minus blank	0.396 ± 0.061	0.427 ± 0.065	0.351 ± 0.022	0.393 ± 0.042	0.425 ± 0.038	0.374 ± 0.030	0.381 ± 0.035	0
Minus blank	0.00533333	0.0666667	0.593667	0.803667	0.864333	0.820667	1.046	0		Minus blank	0.396333	0.427333	0.351333	0.393	0.425	0.374333	0.381333	0.000333333
Percentage of cell viability	0.509879	6.37349	56.7559	76.8324	82.6322	78.4576	100	0		Percentage of cell viability	104.024	112.161	92.2135	103.15	111.549	98.2502	100	0
Average	0.0873333	0.148667	0.675667	0.885667	0.946333	0.902667	1.128	0.082		Average	0.497333	0.528333	0.452333	0.494	0.526	0.475333	0.482333	0.101333
Standard deviation	0.00750555	0.0234592	0.185193	0.167861	0.168589	0.0986425	0.174387	0.00360555		Standard deviation	0.0610109	0.0651869	0.0221209	0.0422966	0.0379868	0.0302379	0.0352467	0.0090185
MCF-7 (2nd Replicate)	Concentration of wtHALT-1 (µg/mL)									MCF-7 (2nd Replicate)	Concentration of mHALT-1 (µg/mL)
Absorbance 570nm	15	10	5	3	2	1	0	Blank		Absorbance 570nm	15	10	5	3	2	1	0	Blank
Reading 1	0.178	0.144	0.198	0.366	0.503	0.467	0.474	0.11		Reading 1	0.608	0.428	0.676	0.536	0.566	0.48	0.474	0.11
Reading 2	0.152	0.131	0.216	0.371	0.455	0.477	0.452	0.092		Reading 2	0.502	0.516	0.524	0.713	0.526	0.507	0.452	0.092
Reading 3	0.146	0.182	0.278	0.427	0.459	0.502	0.521	0.102		Reading 3	0.527	0.45	0.609	0.553	0.485	0.462	0.521	0.102
Average	0.159 ± 0.017	0.152 ± 0.027	0.231 ± 0.042	0.388 ± 0.034	0.472 ± 0.027	0.482 ± 0.018	0.482 ± 0.035	0.101 ± 0.009		Average	0.546 ± 0.055	0.465 ± 0.046	0.603 ± 0.076	0.601 ± 0.098	0.526 ± 0.041	0.483 ± 0.023	0.482 ± 0.035	0.101 ± 0.009
Minus blank	0.058 ± 0.017	0.051 ± 0.027	0.130 ± 0.042	0.287± 0.034	0.371 ± 0.027	0.381 ± 0.018	0.381 ± 0.035	0.000333333		Minus blank	0.445 ± 0.055	0.364 ± 0.046	0.502 ± 0.076	0.500 ± 0.098	0.425 ± 0.041	0.382 ± 0.023	0.381 ± 0.035	0
Minus blank	0.0576667	0.0513333	0.129667	0.287	0.371333	0.381	0.381333	0.000333333		Minus blank	0.444667	0.363667	0.502	0.499667	0.424667	0.382	0.381333	0.000333333
Percentage of cell viability	15.1356	13.4733	34.0332	75.3281	97.4628	100	100	0		Percentage of cell viability	116.71	95.4506	131.759	131.146	111.461	100.262	100	0
Average	0.158667	0.152333	0.230667	0.388	0.472333	0.482	0.482333	0.101333		Average	0.545667	0.464667	0.603	0.600667	0.525667	0.483	0.482333	0.101333
Standard deviation	0.0170098	0.0265016	0.0419682	0.0338674	0.0266333	0.0180278	0.0352467	0.0090185		Standard deviation	0.0554106	0.0457967	0.0761774	0.0976542	0.040501	0.0226495	0.0352467	0.0090185
MCF-7 (3rd Replicate)	Concentration of wtHALT-1 (µg/mL)									MCF-7 (3rd Replicate)	Concentration of mHALT-1 (µg/mL)
Absorbance 570nm	15	10	5	3	2	1	0	Blank		Absorbance 570nm	15	10	5	3	2	1	0	Blank
Reading 1	0.122	0.121	0.141	0.26	0.327	0.551	0.557	0.112		Reading 1	0.447	0.466	0.382	0.466	0.471	0.445	0.557	0.112
Reading 2	0.138	0.16	0.175	0.387	0.563	0.561	0.593	0.116		Reading 2	0.447	0.376	0.402	0.463	0.518	0.461	0.593	0.116
Reading 3	0.155	0.158	0.166	0.348	0.567	0.564	0.529	0.118		Reading 3	0.516	0.471	0.478	0.572	0.503	0.542	0.529	0.118
Average	0.138 ± 0.017	0.146 ± 0.022	0.161 ± 0.018	0.322 ± 0.065	0.486 ± 0.137	0.559 ± 0.007	0.560 ± 0.032	0.115 ± 0.003	3	Average	0.470 ± 0.040	0.438 ± 0.053	0.421 ± 0.051	0.500 ± 0.062	0.497 ± 0.024	0.483 ± 0.052	0.560 ± 0.032	0.115 ± 0.003
Minus blank	0.023 ± 0.017	0.031 ± 0.022	0.046 ± 0.018	0.217 ± 0.065	0.371 ± 0.137	0.444 ± 0.007	0.445 ± 0.032	0.000333333		Minus blank	0.355 ± 0.040	0.323 ± 0.053	0.306 ± 0.051	0.385 ± 0.062	0.382 ± 0.024	0.368 ± 0.052	0.445 ± 0.032	0
Minus blank	0.0233333	0.0313333	0.0456667	0.216667	0.370667	0.443667	0.444667	0.000333333		Minus blank	0.355	0.322667	0.305667	0.385333	0.382333	0.367667	0.444667	0.000333333
Percentage of cell viability	5.24345	7.0412	10.2622	48.6891	83.2959	99.7004	100	0		Percentage of cell viability	79.7753	72.5094	68.6891	86.5918	85.9176	82.6217	100	0
Average	0.138333	0.146333	0.160667	0.331667	0.485667	0.558667	0.559667	0.115333		Average	0.47	0.437667	0.420667	0.500333	0.497333	0.482667	0.559667	0.115333
Standard deviation	0.0165025	0.0219621	0.0176163	0.0650564	0.137424	0.00680686	0.0320832	0.00305505		Standard deviation	0.0398372	0.0534634	0.0506491	0.0620833	0.0240069	0.0520032	0.0320832	0.00305505
MCF-7 (1st Replicate)	Concentration of Camptothecin (µM)
Absorbance 570nm	10	5	1	0.5	0.1	0	Blank
Reading 1	0.885	0.939	0.88	1.101	1.338	1.249	0.087
Reading 2	0.763	0.94	0.844	1.093	1.16	0.978	0.091
Reading 3	0.865	0.839	0.896	1.221	1.807	1.018	0.074
Average	0.838 ± 0.065	0.906 ± 0.058	0.873 ± 0.027	1.138 ± 0.072	1.435 ± 0.334	1.082 ± 0.146	0.084 ± 0.009
Minus blank	0.754 ± 0.065	0.822 ± 0.058	0.789 ± 0.027	1.054 ± 0.072	1.351 ± 0.334	0.998 ± 0.146	0
Minus blank	0.753667	0.822	0.789333	1.05433	1.351	0.997667	0
Percentage of cell viability	75.5177	82.3647	79.0915	105.645	135.371	100	0
Average	0.837667	0.906	0.873333	1.13833	1.435	1.08167	0.084
Standard deviation	0.0654319	0.0580259	0.0266333	0.0717031	0.334229	0.146289	0.00888819
MCF-7 (2nd Replicate)	Concentration of Camptothecin (µM)
Absorbance 570nm	10	5	1	0.5	0.1	0	Blank
Reading 1	1.234	1.249	1.193	1.174	1.557	1.55	0.08
Reading 2	0.806	0.875	0.794	0.999	1.224	1	0.079
Reading 3	0.927	0.956	0.923	1.012	1.442	1.22	0.079
Average	0.989 ± 0.221	1.027 ± 0.197	0.970 ± 0.204	1.062 ± 0.098	1.408 ± 0.169	1.257 ± 0.277	0.079 ± 0.001
Minus blank	0.910 ± 0.221	0.948 ± 0.197	0.891 ± 0.204	0.983 ± 0.098	1.329 ± 0.169	1.178 ± 0.277	0.000333333
Minus blank	0.91	0.947667	0.891	0.982667	1.32867	1.17767	0.000333333
Percentage of cell viability	77.2496	80.4471	75.6367	83.4182	112.79	100	0
Average	0.989	1.02667	0.97	1.06167	1.40767	1.25667	0.0793333
Standard deviation	0.220633	0.19676	0.20361	0.0975004	0.169134	0.276827	0.00057735
MCF-7 (3rd Replicate)	Concentration of Camptothecin (µM)
Absorbance 570nm	10	5	1	0.5	0.1	0	Blank
Reading 1	1.026	1.015	0.898	0.914	1.385	1.724	0.083
Reading 2	0.908	0.944	0.831	0.96	1.161	1.619	0.09
Reading 3	0.799	0.865	0.847	0.873	1.132	1.526	0.081
Average	0.911 ± 0.114	0.941 ± 0.075	0.859 ± 0.035	0.916 ± 0.044	1.226 ± 0.138	1.623 ± 0.099	0.085 ± 0.005
Minus blank	0.826 ± 0.114	0.856 ± 0.075	0.774 ± 0.035	0.831 ± 0.044	1.141 ± 0.138	1.538 ± 0.099	-0.000333333
Minus blank	0.826	0.856333	0.773667	0.830667	1.141	1.538	-0.000333333
Percentage of cell viability	53.7061	55.6784	50.3034	54.0095	74.1873	100	0
Average	0.911	0.941333	0.858667	0.915667	1.226	1.623	0.0846667
Standard deviation	0.11353	0.0750355	0.0349905	0.0435239	0.138459	0.0990606	0.00472582
