# Supplementary material for: Cytotoxic and apoptosis-inducing effects of wildtype and mutated Hydra actinoporin-like toxin 1 (HALT-1) on various cancer cell lines
Source: PeerJ. 2019 May 2;7:e6639. doi: 10.7717/peerj.6639 (PMC6500716; doi:10.7717/peerj.6639)
Supplement: Supplemental Information 6 — Minus blank is average value of each concentration subtracted with average of blank. Standard deviation is standard error calculated from the three readings. [file peerj-07-6639-s009.xlsx]

## Sheet: Sheet1
NHDF (1st Replicate)	Concentration of wtHALT-1 (µg/mL)								NHDF(1st Replicate)	Concentration of mHALT-1 (µg/mL)
Absorbance 570nm	25	20	15	10	5	0	Blank		Absorbance 570nm	25	20	15	10	5	0	Blank
Reading 1	0.237	0.31	0.331	0.444	0.463	0.933	0.151		Reading 1	0.669	0.664	0.843	0.731	0.607	0.933	0.151
Reading 2	0.193	0.29	0.293	0.382	0.43	0.897	0.105		Reading 2	0.768	0.695	0.723	1.768	0.599	0.897	0.105
Reading 3	0.23	0.252	0.3	0.351	0.526	0.775	0.102		Reading 3	0.822	0.816	0.765	0.844	0.747	0.775	0.102
Average	0.220 ± 0.024	0.284 ± 0.029	0.308 ± 0.020	0.392 ± 0.047	0.354 ± 0.049	0.868 ± 0.083	0.119 ± 0.027		Average	0.753 ± 0.078	0.725 ± 0.080	0.777 ± 0.061	1.114 ± 0.569	0.651 ± 0.083	0.868 ± 0.083	0.119 ± 0.068
Minus blank	0.101 ± 0.024	0.165 ± 0.029	0.189 ± 0.020	0.273 ± 0.047	0.354 ± 0.049	0.749 ± 0.083	0.000333333		Minus blank	0.634 ± 0.078	0.606 ± 0.080	0.658 ± 0.061	0.995 ± 0.569	0.532 ± 0.083	0.749 ± 0.083	0
Minus blank	0.101	0.165	0.189	0.273333	0.354	0.749333	0.000333333		Minus blank	0.634	0.606	0.658	0.995333	0.532	0.749333	0.000333333
Percentage of cell viability	13.4846	22.0294	25.2336	36.4931	47.263	100	0		Percentage of cell viability	84.6462	80.9079	87.8505	132.888	71.028	100	0
Average	0.22	0.284	0.308	0.392333	0.473	0.868333	0.119333		Average	0.753	0.725	0.777	1.11433	0.651	0.868333	0.119333
Standard deviation	0.0236432	0.0294618	0.0202237	0.0473533	0.048775	0.082809	0.0274651		Standard deviation	0.0775951	0.0803181	0.0608933	0.568905	0.0832346	0.082809	0.0675717
NHDF (2nd Replicate)	Concentration of wtHALT-1 (µg/mL)								NHDF(2nd Replicate)	Concentration of mHALT-1 (µg/mL)
Absorbance 570nm	25	20	15	10	5	0	Blank		Absorbance 570nm	25	20	15	10	5	0	Blank
Reading 1	0.096	0.118	0.224	0.206	0.296	0.472	0.084		Reading 1	0.434	0.392	0.359	0.38	0.349	0.472	0.084
Reading 2	0.097	0.134	0.119	0.185	0.285	0.357	0.083		Reading 2	0.368	0.375	0.362	0.363	0.367	0.357	0.083
Reading 3	0.113	0.094	0.13	0.184	0.224	0.341	0.085		Reading 3	0.377	0.332	0.321	0.345	0.343	0.341	0.085
Average	0.102 ± 0.010	0.115 ± 0.020	0.158 ± 0.058	0.192 ± 0.012	0.268 ± 0.039	0.390 ± 0.071	0.084 ± 0.001		Average	0.393 ± 0.036	0.366 ± 0.031	0.347 ± 0.023	0.363 ± 0.018	0.353 ± 0.012	0.390 ± 0.071	0.084 ± 0.001
Minus blank	0.018 ± 0.010	0.031 ± 0.020	0.074 ± 0.058	0.108 ± 0.012	0.184 ± 0.039	0.306 ± 0.071	0		Minus blank	0.309 ± 0.036	0.282 ± 0.031	0.263 ± 0.023	0.279 ± 0.018	0.269 ± 0.012	0.306 ± 0.071	0
Minus blank	0.018	0.0313333	0.0736667	0.107667	0.184333	0.306	0		Minus blank	0.309	0.282333	0.263333	0.278667	0.269	0.306	0
Percentage of cell viability	5.88235	10.2397	24.0741	35.1852	60.2397	100	0		Percentage of cell viability	100.98	92.2658	86.0566	91.0675	87.9085	100	0
Average	0.102	0.115333	0.157667	0.191667	0.268333	0.39	0.084		Average	0.393	0.366333	0.347333	0.362667	0.353	0.39	0.084
Standard deviation	0.00953939	0.0201329	0.057709	0.0124231	0.0387857	0.0714633	0.001		Standard deviation	0.0357911	0.0309246	0.0228546	0.0175024	0.01249	0.0714633	0.001
NHDF (3rd Replicate)	Concentration of wtHALT-1 (µg/mL)								NHDF (3rd Replicate)	Concentration of mHALT-1 (µg/mL)
Absorbance 570nm	25	20	15	10	5	0	Blank		Absorbance 570nm	25	20	15	10	5	0	Blank
Reading 1	0.087	0.535	0.892	0.956	0.962	1.766	0.089		Reading 1	2.413	1.651	1.657	1.895	1.268	1.766	0.089
Reading 2	0.256	0.649	1.066	1.054	1.649	1.371	0.069		Reading 2	2.039	1.912	1.205	3.5	1.198	1.371	0.069
Reading 3	0.087	0.401	0.624	1.371	1.11	2.776	0.064		Reading 3	2.65	1.897	1.694	1.374	1.446	2.776	0.064
Average	0.143 ± 0.098	1.295 ± 0.157	0.861 ± 0.223	1.127 ± 0.217	1.240 ± 0.362	1.971 ± 0.725	0.074 ± 0.013	3	Average	2.367 ± 0.308	1.820 ± 0.147	1.519 ± 0.272	2.256 ± 1.108	1.304 ± 0.128	1.971 ± 0.725	0.074 ± 0.013
Minus blank	0.069 ± 0.098	1.221 ± 0.157	0.787 ± 0.223	1.053 ± 0.217	1.166 ± 0.362	1.897 ± 0.725	0		Minus blank	2.293 ± 0.308	1.746 ± 0.147	1.445 ± 0.272	2.182 ± 1.108	1.230 ± 0.128	1.897 ± 0.725	0
Minus blank	0.0693333	0.454333	0.786667	1.053	1.16633	1.897	0		Minus blank	2.29333	1.746	1.44467	2.18233	1.23	1.897	0
Percentage of cell viability	3.65489	23.9501	41.469	55.5087	61.483	100	0		Percentage of cell viability	120.893	92.0401	76.1553	115.041	64.8392	100	0
Average	0.143333	0.528333	0.860667	1.127	1.24033	1.971	0.074		Average	2.36733	1.82	1.51867	2.25633	1.304	1.971	0.074
Standard deviation	0.0975722	0.124134	0.22266	0.216917	0.361569	0.724586	0.0132288		Standard deviation	0.308049	0.14655	0.272273	1.1081	0.127859	0.724586	0.0132288
NHDF (1st Replicate)	Concentration of DMSO (%)
Absorbance 570nm	5	2.5	1.25	0.5	0.25	0	Blank
Reading 1	0.1	0.141	0.259	0.333	0.401	0.472	0.084
Reading 2	0.094	0.117	0.24	0.352	0.413	0.357	0.083
Reading 3	0.115	0.124	0.182	0.324	0.426	0.341	0.085
Average	0.103 ± 0.011	0.127 ± 0.012	0.227 ± 0.040	0.336 ± 0.014	0.413 ± 0.013	0.390 ± 0.071	0.084 ± 0.001
Minus blank	0.019 ± 0.011	0.043 ± 0.012	0.143 ± 0.040	0.252 ± 0.014	0.329 ± 0.013	0.306± 0.071	0
Minus blank	0.019	0.0433333	0.143	0.252333	0.329333	0.306	0
Percentage of cell viability	6.20915	14.1612	46.732	82.4619	107.625	100	0
Average	0.103	0.127333	0.227	0.336333	0.413333	0.39	0.084
Standard deviation	0.0108167	0.0123423	0.0401123	0.0142945	0.0125033	0.0714633	0.001
NHDF (2nd Replicate)	Concentration of DMSO (%)
Absorbance 570nm	5	2.5	1.25	0.5	0.25	0	Blank
Reading 1	0.186	0.535	1.092	1.856	1.962	1.766	0.089
Reading 2	0.335	0.749	1.266	1.684	2.049	1.371	0.069
Reading 3	0.287	0.801	1.124	1.591	2.11	2.776	0.064
Average	0.269 ± 0.076	0.695 ± 0.141	1.161 ± 0.093	1.710 ± 0.134	2.040 ± 0.074	1.971 ± 0.725	0.074 ± 0.013
Minus blank	0.195 ± 0.076	0.621 ± 0.141	1.087 ± 0.093	1.636 ± 0.134	1.966 ± 0.074	1.897 ± 0.725	0
Minus blank	0.195333	0.621	1.08667	1.63633	1.96633	1.897	0
Percentage of cell viability	10.297	32.7359	57.2834	86.259	103.655	100	0
Average	0.269333	0.695	1.16067	1.71033	2.04033	1.971	0.074
Standard deviation	0.0760548	0.140982	0.0926139	0.134448	0.0743797	0.724586	0.0132288
NHDF (3rd Replicate)	Concentration of DMSO (%)
Absorbance 570nm	5	2.5	1.25	0.5	0.25	0	Blank
Reading 1	0.237	0.31	0.511	0.714	0.983	0.933	0.151
Reading 2	0.193	0.29	0.613	0.692	0.889	0.897	0.105
Reading 3	0.23	0.252	0.703	0.751	0.902	0.775	0.102
Average	0.220 ± 0.024	0.284 ± 0.029	0.609 ± 0.096	0.719 ± 0.030	0.925 ± 0.051	0.868 ± 0.083	0.119 ± 0.027
Minus blank	0.101 ± 0.024	0.165 ± 0.029	0.49 ± 0.096	0.600 ± 0.030	0.806 ± 0.051	0.749 ± 0.083	0.000333333
Minus blank	0.101	0.165	0.49	0.6	0.805667	0.749333	0.000333333
Percentage of cell viability	13.4846	22.0294	65.4206	80.1068	107.566	100	0
Average	0.22	0.284	0.609	0.719	0.924667	0.868333	0.119333
Standard deviation	0.0236432	0.0294618	0.0960625	0.0298161	0.0509346	0.082809	0.0274651
