# Supplementary material for: Cytotoxic and apoptosis-inducing effects of wildtype and mutated Hydra actinoporin-like toxin 1 (HALT-1) on various cancer cell lines
Source: PeerJ. 2019 May 2;7:e6639. doi: 10.7717/peerj.6639 (PMC6500716; doi:10.7717/peerj.6639)
Supplement: Supplemental Information 12 — p-values presented were obtained using two-tailed t-test by comparing wtHALT-1 and mHALT-1 on various cell lines. Data significance levels were shown as * p < 0.05, ** p < 0.01, *** p < 0.001. [file peerj-07-6639-s015.xlsx]

## Sheet: Sheet1
Untreated HeLa	R1 (%)	R2 (%)	R3 (%)	Average (%)	Early + Late Apoptosis(%)	Standard deviation	p-value		Untreated HepG2	R1 (%)	R2 (%)	R3 (%)	Average (%)	Early + Late Apoptosis(%)	Standard deviation	p-value
Live	83.47	82.65	79.52	81.88	16.3667	2.08454	0.164198		Live	93.21	58.58	87.72	79.8367	2.02	18.6123	0.531447
Early	7.4	11.6	8.48	9.16		2.18101			Early	0.29	0.17	0	0.153333		0.145717
Late	7.49	4.82	9.31	7.20667		2.25837			Late	0.16	2.87	2.57	1.86667		1.48561
Dead	1.65	0.93	2.69	1.75667		0.884835			Dead	6.34	38.37	9.71	18.14		17.6005
wtHALT-1									wtHALT-1
Live	50.64	19.33	41.73	37.2333	58.3133	16.1321			Live	53.83	23.69	71.67	49.73	9.32667	24.2513
Early	23.16	45.71	37.64	35.5033		11.4258			Early	0.17	0.09	0.03	0.0966667		0.0702377
Late	21.29	30.83	16.31	22.81		7.37837			Late	2.33	23.51	1.85	9.23		12.3692
Dead	5.01	4.12	4.33	4.48667		0.465224			Dead	43.67	52.71	26.44	40.94		13.3461
mHALT-1									mHALT-1
Live	80.41	81.58	78.33	80.1067	17.7267	1.6461			Live	97.53	60.74	86.63	81.6333	4.26333	18.8971
Early	8.47	12.42	8.68	9.85667		2.22239			Early	0.47	0.61	0	0.36		0.319531
Late	8.35	4.6	10.66	7.87		3.05838			Late	0.31	10.51	0.89	3.90333		5.72889
Dead	2.78	1.39	2.33	2.16667		0.709248			Dead	1.7	28.14	12.48	14.1067		13.2948
Camptothecin									Camptothecin
Live	41.39	40.51	34.54	38.8133	55.6967	3.72688			Live	6.63	4.94	10.36	7.31	48.35	2.77325
Early	34.36	38.5	35.02	35.96		2.22432			Early	0.13	0.13	2.37	0.876667		1.29326
Late	20.29	17.6	21.32	19.7367		1.92074			Late	37.25	34.83	70.34	47.4733		19.84
Dead	3.96	3.39	9.12	5.49		3.15656			Dead	55.99	60.1	16.93	44.34		23.8265
Untreated MCF-7	R1 (%)	R2 (%)	R3 (%)	Average (%)	Early + Late Apoptosis(%)	Standard deviation	p-value		Untreated SW-620	R1 (%)	R2 (%)	R3 (%)	Average (%)	Early + Late Apoptosis(%)	Standard deviation	p-value
Live	95	83.53	88.41	88.98	9.58667	5.75621	0.276654		Live	93.18	81.46	88.7	87.78	11.3367	5.91392	0.597066
Early	0.8	15.21	0.16	5.39		8.51039			Early	2.81	8.22	9.32	6.78333		3.48469
Late	3.43	1.24	7.92	4.19667		3.40535			Late	3.65	8.11	1.9	4.55333		3.20204
Dead	0.78	0.02	3.52	1.44		1.84098			Dead	0.35	2.21	0.07	0.876667		1.16316
wtHALT-1									wtHALT-1
Live	90.85	45.77	77.3	71.3067	25.4333	23.1299			Live	70.44	84.14	93.37	82.65	13.0667	11.5374
Early	3.2	50.1	1.05	18.1167		27.7192			Early	3.38	5.33	4.08	4.26333		0.987843
Late	3.84	4.04	14.07	7.31667		5.84941			Late	14.36	9.59	2.46	8.80333		5.98888
Dead	2.1	0.09	7.58	3.25667		3.87665			Dead	11.82	0.94	0.09	4.28333		6.54077
mHALT-1									mHALT-1
Live	93.12	64.94	85.15	81.07	16.9233	14.5263			Live	69.98	81.18	86.04	79.0667	20.19	8.23593
Early	2.51	32.1	1.05	11.8867		17.5205			Early	15.92	10.12	12	12.68		2.95919
Late	2.59	2.84	9.68	5.03667		4.02319			Late	13.46	7.26	1.81	7.51		5.82902
Dead	1.77	0.12	4.12	2.00333		2.01018			Dead	0.64	1.44	0.15	0.743333		0.651178
Camptothecin									Camptothecin
Live	59.72	42.66	31.95	44.7767	28.0533	14.0055			Live	79.96	63.86	74.44	72.7533	26.8167	8.18145
Early	6.32	2.93	12.82	7.35667		5.02584			Early	7.56	18.74	17.46	14.5867		6.11883
Late	14.07	18.35	29.67	20.6967		8.06041			Late	11.96	16.63	8.1	12.23		4.2714
Dead	19.89	36.05	25.55	27.1633		8.19991			Dead	0.51	0.77	0	0.426667		0.391706
