# Supplementary material for: Cytotoxic and apoptosis-inducing effects of wildtype and mutated Hydra actinoporin-like toxin 1 (HALT-1) on various cancer cell lines
Source: PeerJ. 2019 May 2;7:e6639. doi: 10.7717/peerj.6639 (PMC6500716; doi:10.7717/peerj.6639)
Supplement: Supplemental Information 17 — p-values presented were obtained using two-tailed t-test by comparing wtHALT-1 and mHALT-1 on HeLa cells. Data significance levels were shown as * p < 0.05, ** p < 0.01, *** p < 0.001. [file peerj-07-6639-s020.xlsx]

## Sheet: Sheet1
	Fluoroscence Intensity for HeLa
		Area	Intensity		Normalization against untreated HeLa	Standard deviation	p- value
				RawIntDen
	First Replicate						0.971
	Untreated	1443520	20028605	20028605	1
	HALT-1 (Wild type)	1443520	42187040	42187040	2.10634
	HALT-1 (Y110A)	1443520	23321804	23321804	1.16442
	Camptothecin	1443520	23884693	23884693	1.19253
	Second Replicate
	Untreated	1443520	13681317	13681317	1
	HALT-1 (Wild type)	1443520	13687858	13687858	1.00048	0
	HALT-1 (Y110A)	1443520	26141804	26141804	1.91077	0
	Camptothecin	1443520	24948575	24948575	1.82355	0
	Third Replicate
	Untreated	1443520	24656000	24656000	1
	HALT-1 (Wild type)	1443520	28999091	28999091	1.17615
	HALT-1 (Y110A)	1440744	28135542	28135542	1.14112
	Camptothecin	1441440	19458319	19458319	0.789192	0
	Average					0
	Untreated	1443520	1.94553e+07		0	0
	HALT-1 (Wild type)	1443520	2.82913e+07		1.45417	0.594285
	HALT-1 (Y110A)	1.44259e+06	2.58664e+07		1.32953	0.437782
	Camptothecin	1.44283e+06	2.27639e+07		1.17006	0.521339
	Fluoroscence Intensity for HepG2
		Area	Intensity		Normalization against untreated HepG2	Standard deviation	p- value
				RawIntDen
	First Replicate						0.316
	Untreated	1443520	2779869	2779869	1
	HALT-1 (Wild type)	1443520	34925687	34925687	12.5638
	HALT-1 (Y110A)	1443520	7397645	7397645	2.66115
	Camptothecin	1441440	4755031	4755031	1.71052
	Second Replicate
	Untreated	1443520	2909605	2909605	1
	HALT-1 (Wild type)	1443520	6288375	6288375	2.16125
	HALT-1 (Y110A)	1357464	6129672	6129672	2.1067
	Camptothecin	1443520	3353967	3353967	1.15272
	Third Replicate
	Untreated	1441440	4554555	4554555	1
	HALT-1 (Wild type)	1441440	12009486	12009486	2.63681
	HALT-1 (Y110A)	1443520	7483969	7483969	0.623171
	Camptothecin	1443520	4089732	4089732	0.897943
	Average
	Untreated	1.44283e+06	3.41468e+06		1	0
	HALT-1 (Wild type)	1.44283e+06	1.77412e+07		5.19557	5.87344
	HALT-1 (Y110A)	1.41483e+06	7003762		2.05108	1.05369
	Camptothecin	1.44283e+06	4.06624e+06		1.19081	0.4156
	Fluoroscence Intensity for MCF-7
		Area	Intensity		Normalization against untreated MCF-7	Standard deviation	p- value
				RawIntDen
	First Replicate						0.589
	Untreated	1443520	13966681	24841513
	HALT-1 (Wild type)	1441440	24841513	11103343	1.77863
	HALT-1 (Y110A)	1443520	11103343	17283577	0.794988
	Camptothecin	1443520	17283577		1.23749
	Second Replicate
	Untreated	1443520	13657074	26337100
	HALT-1 (Wild type)	1441440	26337100	10415001	1.92846
	HALT-1 (Y110A)	1443520	10415001	9216046	0.762609
	Camptothecin	1443520	9216046		0.674818
	Third Replicate
	Untreated	1440744	20284465	22897190
	HALT-1 (Wild type)	1443520	22897190	40994591	1.1288
	HALT-1 (Y110A)	1440744	40994591	5112600	2.02098
	Camptothecin	1441440	5112600		0.252045
	Average
	Untreated	1.44259e+06	1.59694e+07
	HALT-1 (Wild type)	1.44213e+06	2.46919e+07		1.5462	0.425082
	HALT-1 (Y110A)	1.44259e+06	20837645		1.30485	0.717359
	Camptothecin	1.44283e+06	1.05374e+07		0.65985	0.494373
	Fluoroscence Intensity for SW-620
		Area	Intensity		Normalization against untreated SW-620	Standard deviation	p- value
				RawIntDen
	First Replicate						0.055
	Untreated	1443520	4761565	RawIntDen
	HALT-1 (Wild type)	1441440	8781899	4761565	1.84433
	HALT-1 (Y110A)	1443520	6931770	8781899	1.45578
	Camptothecin	1443520	4953331	6931770	1.04027
	Second Replicate
	Untreated	1443520	1691666	13297868
	HALT-1 (Wild type)	1443520	13297868	11621801	7.86081
	HALT-1 (Y110A)	1443520	11621801	4196145	6.87003
	Camptothecin	1443520	4196145		2.48048
	Third Replicate
	Untreated	1443520	2789504	5609607
	HALT-1 (Wild type)	1443520	5609607	3473926	2.01097
	HALT-1 (Y110A)	1443520	3473926	1761545	1.24536
	Camptothecin	1443520	1761545		0.63149
	Average
	Untreated	1443520	3.08091e+06
	HALT-1 (Wild type)	1.44283e+06	9.22979e+06		2.9958	3.42653
	HALT-1 (Y110A)	1443520	7342499		1	3.1884
	Camptothecin	1443520	3637007		1.1805	0.971259
